# Supplementary material for: A Safe Harbor: Writing Groups in the Middle School Classroom.
Source: MDPI journal article supplement (doi:10.3390/molecules29081739), 2001-01-01
Supplement: s1 [file s1]

## SUPPORTING INFORMATION

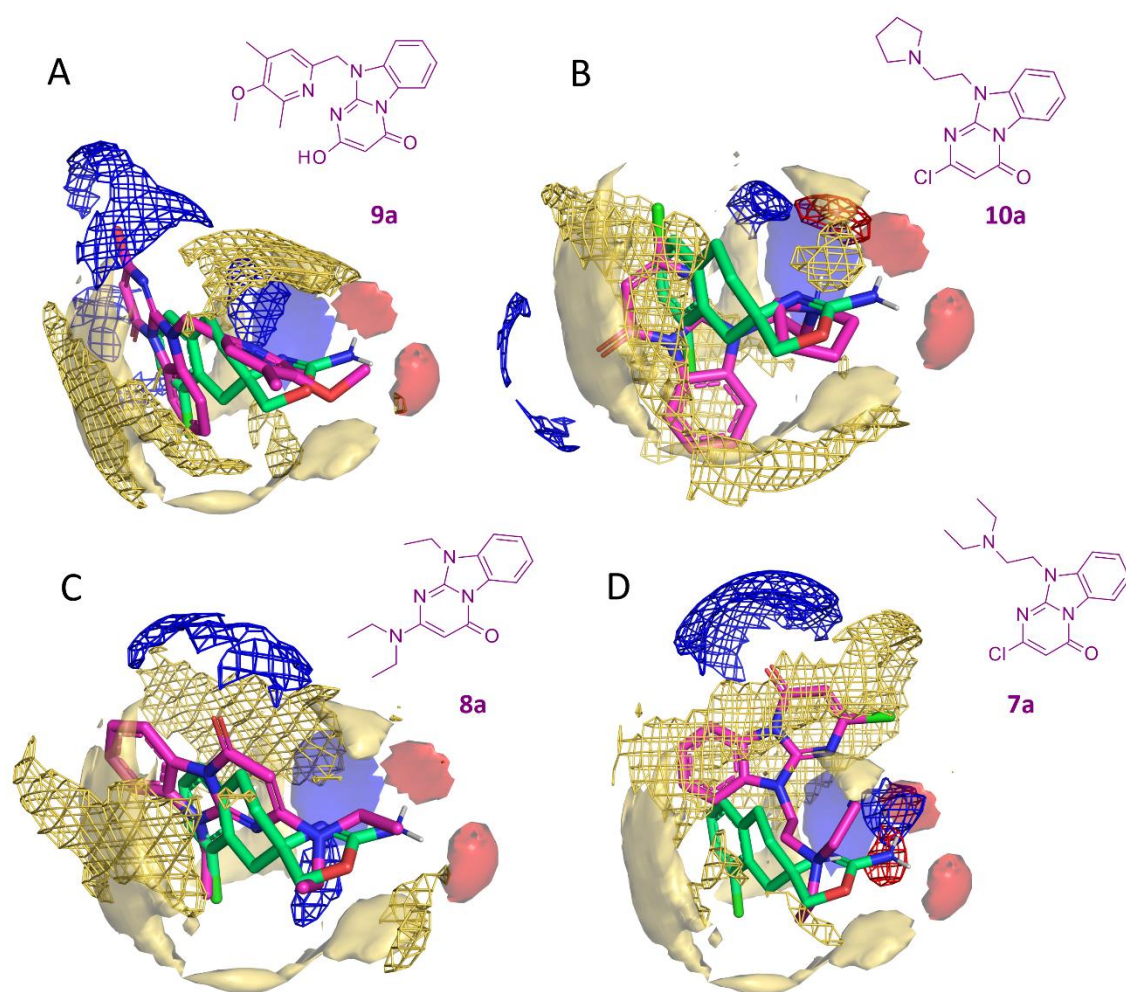

**Figure S1.** MIF Comparison of the template **S18686 1** [43] (C atom; green) MIFs (solid) and those (wireframes) of the candidates [59] (C atom; magenta). Blue: N1 MIF, red: O MIF, yellow: DRY MIF. The analysis is reported for compounds **9a** (A) **10a** (B), **8a** (C) and **7a** (D), based on the calculated Glob-Prod ranking (**9a**, Glob-Prod = 0.2692; **10a**, Glob-Prod = 0.2463; **8a**, Glob-Prod = 0.2435; **7a**, Glob-Prod = 0.1051).

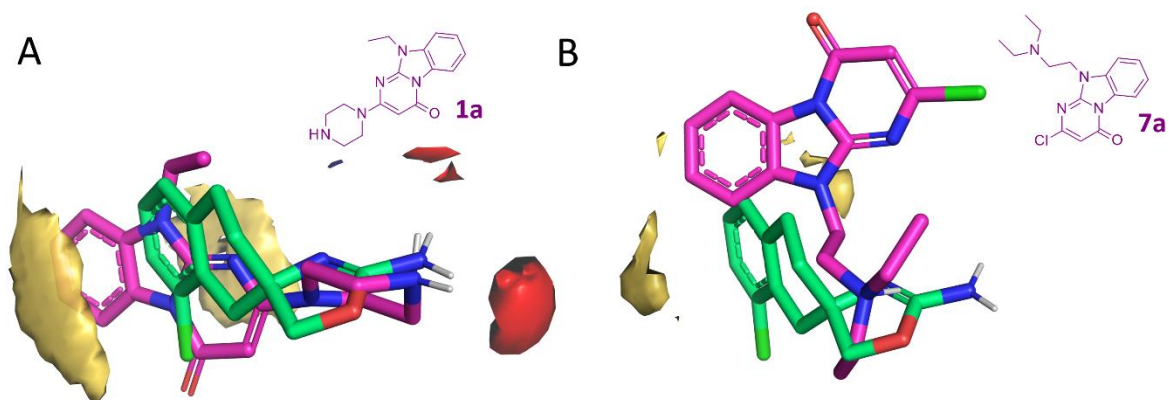

**Figure S2.** Common MIFs between the candidate and **S18686 1** [43]. Blue: N1 MIF, red: O MIF, yellow: DRY MIF. The analysis is reported for the top-scored compound **1a** (Glob-Prod = 0.3499) (A) and the lowest one **7a** (Glob-Prod = 0.1051) (B). For **1a** an almost large common MIF pattern is found (A). On the contrary, the common areas when considering **7a** are limited (B).

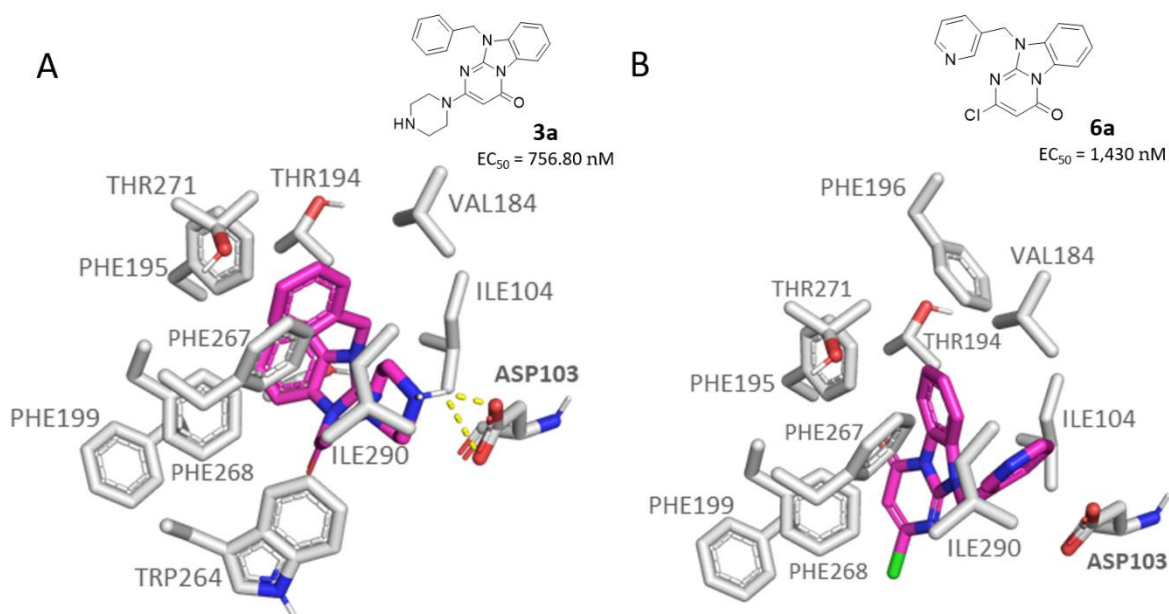

**Figure S3.** Molecular docking pose of compound **3a** (C atom; violet) (A) and **6a** (C atom; violet) (B) within the *hTAAR1* binding site. The most important residues are shown and labeled. The chemical structure of the two compounds **3a** [59] and **6a** [59] is also reported.

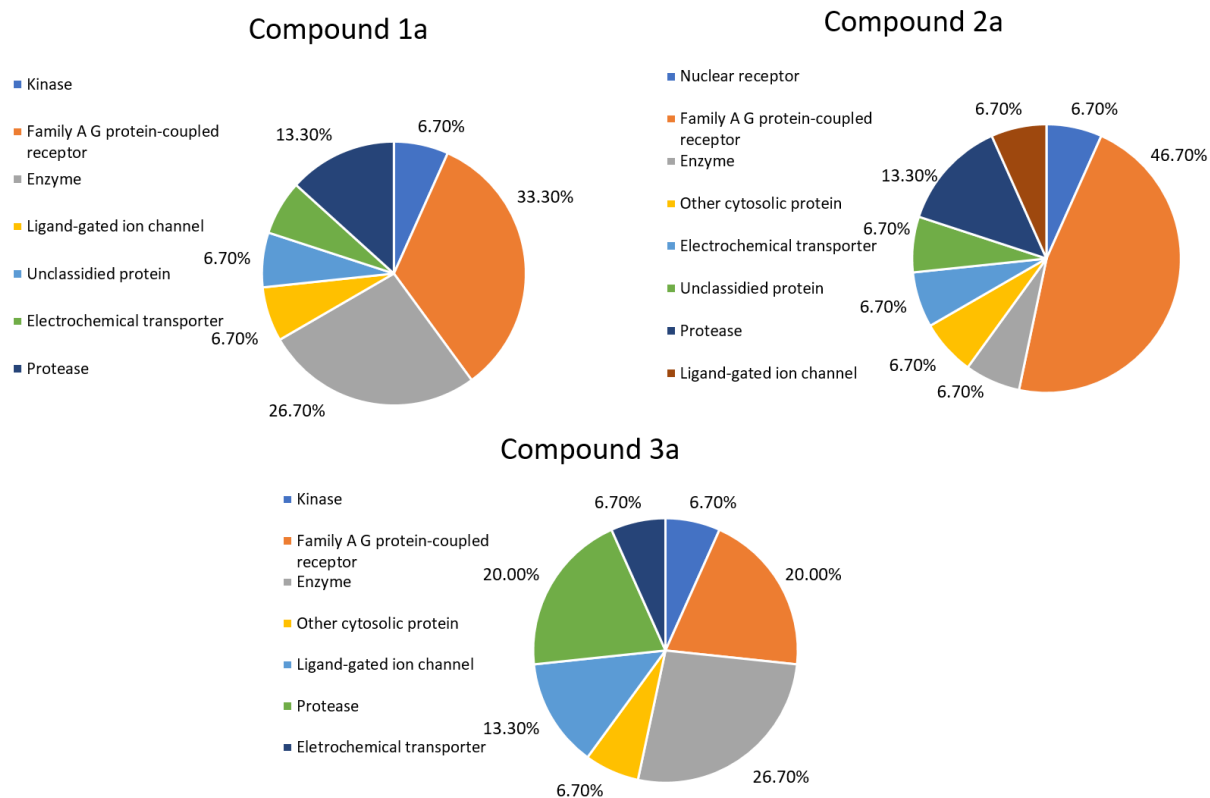

**Figure S4.** Prediction of putative off-targets preferences featured by **1a-3a** [59]. The reported in silico evaluation was performed thanks to SwissTarget website [60].

**Table S1.** Chemical structure and biological activity as *h*TAAR1 agonists of compounds **1-37** [38, 43].

| Compound          | SMILE structure                             | Chemical structure | <i>h</i> TAAR1<br>EC <sub>50</sub> (nM) |
|-------------------|---------------------------------------------|--------------------|-----------------------------------------|
| <b>S18616 (1)</b> | <chem>Clc1c2CC3(N=C(OC3)N)CCc2ccc1</chem>   |                    | 15                                      |
| <b>2</b>          | <chem>Clc1ccccc1C[C@@H]1N=C(OC1)N</chem>    |                    | 154                                     |
| <b>3</b>          | <chem>O1C[C@@H](N=C1N)Cc1ccccc1</chem>      |                    | 330                                     |
| <b>4</b>          | <chem>O1C[C@H](N=C1N)Cc1ccccc1</chem>       |                    | 2900                                    |
| <b>5</b>          | <chem>Clc1cc(ccc1)CC[C@@H]1N=C(OC1)N</chem> |                    | 18                                      |

|    |                                                 |                                                                                      |      |
|----|-------------------------------------------------|--------------------------------------------------------------------------------------|------|
| 6  | <chem>O1C[C@@H](N=C1N)CCc1ccccc1</chem>         | 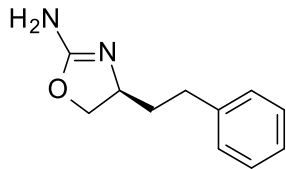   | 27   |
| 7  | <chem>Clc1cc(ccc1)CC[C@@]1(N=C(OC1)N)C</chem>   |    | 330  |
| 8  | <chem>Clc1cc(OC[C@@H]2N=C(OC2)N)ccc1</chem>     |    | 270  |
| 9  | <chem>Clc1cc(NC[C@@H]2N=C(OC2)N)ccc1</chem>     |    | 580  |
| 10 | <chem>Clc1cc(N(C[C@@H]2N=C(OC2)N)C)cc1</chem>   |   | 27   |
| 11 | <chem>Clc1cc(N(C[C@@H]2N=C(OC2)N)CC)ccc1</chem> |  | 29   |
| 12 | <chem>O1C[C@@H](N=C1N)CN(CC)c1ccccc1</chem>     |  | 59   |
| 13 | <chem>O1C[C@@H](N=C1N)CN(C(C)C)c1ccccc1</chem>  |  | 140  |
| 14 | <chem>O1C[C@H](N=C1N)CN(CC)c1ccccc1</chem>      |  | 230  |
| 15 | <chem>O1C[C@@H](N=C1N)C[C@H](C)c1ccccc1</chem>  |  | 1540 |

|    |                                                  |                                                                                      |      |
|----|--------------------------------------------------|--------------------------------------------------------------------------------------|------|
| 16 | <chem>O1C[C@@H](N=C1N)C[C@@H](C)c1ccccc1</chem>  | 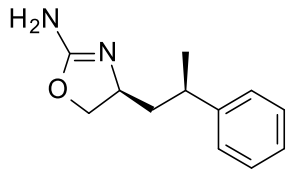   | 730  |
| 17 | <chem>O1C[C@@H](N=C1N)C[C@@H](CC)c1ccccc1</chem> |    | 2260 |
| 18 | <chem>O1C[C@@H](N=C1N)C[C@H](CC)c1ccccc1</chem>  |    | 18   |
| 19 | <chem>O1C[C@@H](N=C1N)CCCc1ccccc1</chem>         |    | 27   |
| 20 | <chem>O1C[C@@H](N=C1N)COCc1ccccc1</chem>         |   | 360  |
| 21 | <chem>O1C[C@@H](N=C1N)CCOc1ccccc1</chem>         |  | 9    |
| 22 | <chem>O1CC(N=C1N)c1ccccc1</chem>                 |  | 67   |
| 23 | <chem>Clc1ccccc1C1N=C(OC1)N</chem>               |  | 23   |
| 24 | <chem>Clc1cc(ccc1)C1N=C(OC1)N</chem>             |  | 21   |
| 25 | <chem>Clc1ccc(cc1)C1N=C(OC1)N</chem>             |  | 143  |
| 26 | <chem>Clc1cc(ccc1Cl)C1N=C(OC1)N</chem>           |  | 31   |

|    |                                                  |  |        |
|----|--------------------------------------------------|--|--------|
| 27 | <chem>Brc1ccc(cc1)C1N=C(OC1)N</chem>             |  | 150    |
| 28 | <chem>Brc1ccc(cc1)[C@H]1N=C(OC1)N</chem>         |  | >10000 |
| 29 | <chem>Clc1ccccc1[C@@]1(N=C(OC1)N)C</chem>        |  | 165    |
| 30 | <chem>Brc1ccc(cc1)[C@@]1(N=C(OC1)N)C</chem>      |  | 41     |
| 31 | <chem>O1C[C@@H](N=C1N)c1ccc(cc1)-c1ccccc1</chem> |  | 2670   |
| 32 | <chem>Fc1cc(ccc1)[C@@H]1N=C(OC1)N</chem>         |  | 490    |
| 33 | <chem>O1C[C@@H](N=C1N)c1ccccc1C</chem>           |  | 67     |
| 34 | <chem>Clc1cc(C)c(cc1)[C@@H]1N=C(OC1)N</chem>     |  | 11     |
| 35 | <chem>Clc1cc(CC)c(cc1)[C@@H]1N=C(OC1)N</chem>    |  | 26     |
| 36 | <chem>Clc1cc(C2CC2)c(cc1)[C@@H]1N=C(OC1)N</chem> |  | 12     |
| 37 | <chem>Fc1cccc([C@@H]2N=C(OC2)N)c1C</chem>        |  | 17     |

Table S2. Chemical structure of the in-house compounds 1a-10a [59].

| Compound | SMILE structure | Chemical structure |
|----------|-----------------|--------------------|
|----------|-----------------|--------------------|

|    |                                                              |  |
|----|--------------------------------------------------------------|--|
| 1a | <chem>O=C1N2c3c(N(C2=NC(N2CCNCC2)=C1)CC)cccc3</chem>         |  |
| 2a | <chem>O=C1N2c3c(N(C2=NC(N2CCNCC2)=C1)CCC)cccc3</chem>        |  |
| 3a | <chem>O=C1N2c3c(N(C2=NC(N2CCNCC2)=C1)Cc1cccc1)cccc3</chem>   |  |
| 4a | <chem>O=C1N2c3c(N(C2=NC(N2CCNCC2)=C1)CCN1CCCC1)cccc3</chem>  |  |
| 5a | <chem>O1CCN(CC1)CCN1c2c(N3C1=NC(N1CCNCC1)=CC3=O)cccc2</chem> |  |
| 6a | <chem>ClC=1N=C2N(c3c(N2Cc2cccn2)cccc3)C(=O)C=1</chem>        |  |
| 7a | <chem>ClC=1N=C2N(c3c(N2CCN(CC)CC)cccc3)C(=O)C=1</chem>       |  |
| 8a | <chem>O=C1N2c3c(N(C2=NC(N(CC)CC)=C1)CC)cccc3</chem>          |  |

|            |                                                              |                                                                                     |
|------------|--------------------------------------------------------------|-------------------------------------------------------------------------------------|
| <b>9a</b>  | <chem>O(C)c1c(cc(nc1C)CN1c2c(N3C1=NC(O)=CC3=O)cccc2)C</chem> | 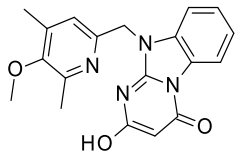 |
| <b>10a</b> | <chem>ClC=1N=C2N(c3c(N2CCN2CCCC2)cccc3)C(=O)C=1</chem>       |  |

**Table S3.** Ten top scored docking positioning of **1-37** [38, 43] at the *hTAAR1* (MOE software). The predicted  $\Delta G$  value of each protein-ligand complex has been reported, as calculated in terms of final scoring function (S, as Kcal/mol). The top-scored pose for each compound is highlighted in cyan. The compounds  $EC_{50}$  values are also reported.

| Compound                                       | Pose | S       | E_conf   | E_place  | E_score<br>1 | E_refine | E_score<br>2 |
|------------------------------------------------|------|---------|----------|----------|--------------|----------|--------------|
| <b>1</b><br><i>hTAAR1</i> $EC_{50}$ = 15<br>nM | 1    | -6.8545 | -37.2407 | -20.5108 | -8.2982      | 36.9326  | -6.8545      |
|                                                | 2    | -5.0428 | -26.1434 | -21.4527 | -7.6237      | 56.3373  | -5.0428      |
|                                                | 3    | -4.9404 | -40.3592 | -18.4309 | -7.4393      | 37.3493  | -4.9404      |
|                                                | 4    | -4.8130 | -41.0371 | -23.3400 | -8.2540      | 26.4267  | -4.8130      |
|                                                | 5    | -4.6694 | -39.8789 | -24.8717 | -10.3595     | 40.1172  | -4.6694      |
|                                                | 6    | -4.1973 | -33.0527 | -20.4493 | -7.6808      | 55.0638  | -4.1973      |
|                                                | 7    | -4.0104 | -34.0839 | -19.8069 | -7.7222      | 71.2140  | -4.0104      |
|                                                | 8    | -3.6697 | -33.0988 | -24.4046 | -9.1082      | 49.9467  | -3.6697      |
|                                                | 9    | -3.5519 | -32.8718 | -16.1752 | -7.6066      | 56.6206  | -3.5519      |
|                                                | 10   | -3.3840 | -36.5861 | -14.1440 | -7.5789      | 51.6696  | -3.3840      |
| <b>2</b> <i>hTAAR1</i> $EC_{50}$ =<br>154 nM   | 1    | -6.2525 | -34.2820 | -23.1189 | -8.0869      | 63.0192  | -6.2525      |
|                                                | 2    | -5.6656 | -29.7123 | -23.2903 | -7.9338      | 52.7397  | -5.6656      |
|                                                | 3    | -5.6250 | -16.9957 | -20.3914 | -6.9026      | 59.4729  | -5.6250      |
|                                                | 4    | -5.2571 | -39.3765 | -22.7332 | -7.8917      | 50.8643  | -5.2571      |
|                                                | 5    | -5.1724 | -11.6383 | -17.9664 | -7.2081      | 60.2704  | -5.1724      |
|                                                | 6    | -5.0815 | -21.6107 | -21.1884 | -6.9240      | 60.3734  | -5.0815      |
|                                                | 7    | -4.5611 | 4.0224   | -20.2926 | -6.8473      | 98.5157  | -4.5611      |
|                                                | 8    | -4.4675 | -16.5428 | -24.0932 | -7.2734      | 76.6828  | -4.4675      |
|                                                | 9    | -4.4422 | -14.6227 | -27.8064 | -7.0100      | 91.5883  | -4.4422      |
|                                                | 10   | -4.2042 | -23.7206 | -20.6120 | -7.1150      | 54.4230  | -4.2042      |
| <b>3</b> <i>hTAAR1</i> $EC_{50}$ =<br>330 nM   | 1    | -6.1549 | -36.0158 | -22.0657 | -7.4157      | 51.1603  | -6.1549      |
|                                                | 2    | -5.3518 | -29.8008 | -19.8627 | -7.2807      | 33.3252  | -5.3518      |
|                                                | 3    | -5.1618 | -32.7916 | -21.6630 | -7.6446      | 47.6420  | -5.1618      |
|                                                | 4    | -5.0378 | -22.3801 | -22.9869 | -7.3410      | 36.5296  | -5.0378      |
|                                                | 5    | -4.8235 | -29.6521 | -26.7732 | -9.1078      | 58.5681  | -4.8235      |
|                                                | 6    | -4.7783 | -36.1597 | -18.8590 | -7.1199      | 47.1015  | -4.7783      |
|                                                | 7    | -4.7284 | -15.7114 | -24.0604 | -7.4255      | 66.7364  | -4.7284      |



|                                                    |    |         |          |          |         |         |         |
|----------------------------------------------------|----|---------|----------|----------|---------|---------|---------|
|                                                    | 8  | -4.5758 | -41.5078 | -21.9644 | -7.1257 | 45.3505 | -4.5758 |
|                                                    | 9  | -4.3038 | -32.8088 | -16.6207 | -7.3800 | 57.2294 | -4.3038 |
|                                                    | 10 | -4.0940 | -23.5133 | -23.4203 | -7.7124 | 44.9587 | -4.0940 |
| <b>4</b> <i>h</i> TAAR1 EC <sub>50</sub> = 2900 nM | 1  | -6.7972 | -38.0066 | -19.9762 | -8.5578 | 36.1022 | -6.7972 |
|                                                    | 2  | -6.4669 | -31.7055 | -26.3440 | -8.5643 | 35.6879 | -6.4669 |
|                                                    | 3  | -5.2996 | -31.5329 | -20.9002 | -7.2604 | 27.5932 | -5.2996 |
|                                                    | 4  | -4.9246 | -35.9998 | -22.3115 | -7.1174 | 29.8987 | -4.9246 |
|                                                    | 5  | -4.9028 | -43.9267 | -16.9371 | -7.1407 | 31.2623 | -4.9028 |
|                                                    | 6  | -4.7972 | -24.7701 | -23.7803 | -6.9858 | 42.8882 | -4.7972 |
|                                                    | 7  | -4.6714 | -33.4334 | -22.4209 | -7.1023 | 26.2756 | -4.6714 |
|                                                    | 8  | -4.1795 | -36.8714 | -18.7170 | -7.7451 | 40.7910 | -4.1795 |
|                                                    | 9  | -4.1160 | -35.4978 | -18.3147 | -7.8329 | 35.8753 | -4.1160 |
|                                                    | 10 | -3.5924 | -30.5785 | -18.4338 | -7.7216 | 55.8822 | -3.5924 |
| <b>5</b> <i>h</i> TAAR1 EC <sub>50</sub> = 18 nM   | 1  | -6.8864 | -15.3874 | -19.4253 | -6.8157 | 61.5280 | -6.8864 |
|                                                    | 2  | -5.6539 | -37.4924 | -23.3899 | -7.6575 | 57.3307 | -5.6539 |
|                                                    | 3  | -5.5774 | -44.6408 | -20.5300 | -6.2518 | 41.3936 | -5.5774 |
|                                                    | 4  | -5.1564 | -34.6700 | -20.4675 | -7.8286 | 52.0739 | -5.1564 |
|                                                    | 5  | -4.8274 | -15.6303 | -15.1902 | -6.5498 | 81.3096 | -4.8274 |
|                                                    | 6  | -4.7919 | -23.9413 | -17.9953 | -7.1429 | 93.6337 | -4.7919 |
|                                                    | 7  | -4.7877 | -35.7884 | -14.1168 | -6.4866 | 61.8682 | -4.7877 |
|                                                    | 8  | -4.7084 | -33.8470 | -25.1072 | -6.8446 | 69.2430 | -4.7084 |
|                                                    | 9  | -4.6625 | -28.7702 | -15.3947 | -6.4696 | 83.7171 | -4.6625 |
|                                                    | 10 | -4.6447 | -23.2218 | -19.0323 | -6.5708 | 86.0438 | -4.6447 |
| <b>6</b> <i>h</i> TAAR1 EC <sub>50</sub> = 27 nM   | 1  | -7.1321 | -27.3425 | -24.5538 | -8.0463 | 36.1247 | -7.1321 |
|                                                    | 2  | -5.7943 | -29.1738 | -27.3264 | -7.1039 | 47.8371 | -5.7943 |
|                                                    | 3  | -5.4822 | -25.5393 | -20.1710 | -6.9600 | 58.5414 | -5.4822 |
|                                                    | 4  | -5.1047 | -37.7120 | -26.1677 | -8.2777 | 51.7574 | -5.1047 |
|                                                    | 5  | -4.9999 | -46.2657 | -23.1260 | -7.6310 | 33.5905 | -4.9999 |
|                                                    | 6  | -4.6681 | -31.5881 | -18.5909 | -7.7499 | 77.4750 | -4.6681 |
|                                                    | 7  | -4.5985 | -12.3695 | -22.4607 | -7.3528 | 83.3501 | -4.5985 |
|                                                    | 8  | -4.5097 | -42.3900 | -16.6551 | -7.0548 | 69.8001 | -4.5097 |
|                                                    | 9  | -4.4846 | -42.8587 | -23.6359 | -8.7270 | 44.0275 | -4.4846 |
|                                                    | 10 | -4.3983 | -38.4380 | -16.6926 | -6.7957 | 75.4903 | -4.3983 |
| <b>7</b> <i>h</i> TAAR1 EC <sub>50</sub> = 330 nM  | 1  | -5.6156 | -34.0375 | -18.2656 | -6.6363 | 49.0827 | -5.6156 |
|                                                    | 2  | -4.8597 | -43.4411 | -16.5363 | -6.6186 | 41.2759 | -4.8597 |
|                                                    | 3  | -4.8347 | -30.2570 | -24.3336 | -8.8323 | 52.7929 | -4.8347 |
|                                                    | 4  | -4.5006 | -28.2558 | -18.8814 | -6.5490 | 54.8886 | -4.5006 |
|                                                    | 5  | -4.4203 | -43.8437 | -23.2039 | -7.1151 | 48.7528 | -4.4203 |
|                                                    | 6  | -4.1130 | -12.4839 | -24.6910 | -6.8143 | 67.1244 | -4.1130 |
|                                                    | 7  | -3.8998 | -38.0914 | -18.9045 | -8.7773 | 51.6346 | -3.8998 |
|                                                    | 8  | -3.8162 | -42.6710 | -17.4310 | -7.6884 | 68.7750 | -3.8162 |
|                                                    | 9  | -3.7170 | -33.6538 | -18.5100 | -8.5352 | 50.8417 | -3.7170 |
|                                                    | 10 | -3.6921 | -31.3123 | -16.1915 | -6.4398 | 56.4030 | -3.6921 |

|                                                     |    |         |          |          |         |          |         |
|-----------------------------------------------------|----|---------|----------|----------|---------|----------|---------|
| <b>8 <i>h</i>TAAR1 EC<sub>50</sub> =<br/>270 nM</b> | 1  | -6.1963 | -8.2608  | -22.6254 | -6.3889 | 72.0812  | -6.1963 |
|                                                     | 2  | -5.6427 | -4.8025  | -27.0414 | -8.0195 | 69.5870  | -5.6427 |
|                                                     | 3  | -5.3609 | -26.2730 | -18.5638 | -6.4766 | 58.1031  | -5.3609 |
|                                                     | 4  | -5.2596 | -31.7425 | -17.0212 | -6.8020 | 46.5876  | -5.2596 |
|                                                     | 5  | -4.9436 | -12.9168 | -24.7847 | -7.3462 | 79.2828  | -4.9436 |
|                                                     | 6  | -4.7103 | -27.6818 | -21.1480 | -6.2127 | 64.9465  | -4.7103 |
|                                                     | 7  | -4.7087 | -17.3333 | -22.0571 | -6.2409 | 81.4235  | -4.7087 |
|                                                     | 8  | -4.6418 | -28.6830 | -15.1207 | -5.9025 | 85.2829  | -4.6418 |
|                                                     | 9  | -4.5947 | -20.5807 | -17.6996 | -5.9701 | 91.7289  | -4.5947 |
|                                                     | 10 | -4.5442 | 1.9884   | -23.1870 | -6.9047 | 99.8646  | -4.5442 |
| <b>9 <i>h</i>TAAR1 EC<sub>50</sub> =<br/>580 nM</b> | 1  | -4.9034 | -8.0685  | -19.1901 | -7.5926 | 67.2207  | -4.9034 |
|                                                     | 2  | -4.6410 | -34.1585 | -23.0496 | -6.8627 | 38.1620  | -4.6410 |
|                                                     | 3  | -4.5640 | -27.7642 | -23.3127 | -7.1348 | 55.3547  | -4.5640 |
|                                                     | 4  | -3.9563 | -33.3501 | -19.7852 | -6.7878 | 77.3748  | -3.9563 |
|                                                     | 5  | -3.8805 | -37.2053 | -21.6179 | -6.9927 | 56.0357  | -3.8805 |
|                                                     | 6  | -3.8407 | -19.9476 | -24.6522 | -7.7349 | 82.2431  | -3.8407 |
|                                                     | 7  | -3.8335 | -38.4174 | -18.8258 | -7.4769 | 65.9573  | -3.8335 |
|                                                     | 8  | -3.6748 | -24.8021 | -15.4494 | -8.7039 | 57.5789  | -3.6748 |
|                                                     | 9  | -3.4381 | -32.3985 | -22.5903 | -8.2978 | 74.3877  | -3.4381 |
|                                                     | 10 | -3.2971 | -18.9408 | -24.7972 | -7.2835 | 90.6948  | -3.2971 |
| <b>10 <i>h</i>TAAR1 EC<sub>50</sub> =<br/>27 nM</b> | 1  | -6.5934 | 8.9311   | -22.3847 | -7.7689 | 99.7301  | -6.5934 |
|                                                     | 2  | -6.5830 | -4.9196  | -17.4415 | -7.1127 | 88.1359  | -6.5830 |
|                                                     | 3  | -6.0577 | -26.3055 | -22.4049 | -7.4483 | 59.6633  | -6.0577 |
|                                                     | 4  | -5.6404 | -20.2312 | -19.4029 | -7.8313 | 81.9541  | -5.6404 |
|                                                     | 5  | -5.2880 | 14.4903  | -14.7012 | -6.5248 | 94.6400  | -5.2880 |
|                                                     | 6  | -4.8288 | 41.8128  | -17.8033 | -6.7447 | 140.9574 | -4.8288 |
|                                                     | 7  | -4.7683 | -13.0329 | -21.6526 | -8.8171 | 78.7586  | -4.7683 |
|                                                     | 8  | -4.7230 | -22.4103 | -22.4719 | -6.5913 | 65.3933  | -4.7230 |
|                                                     | 9  | -4.5278 | 2.1590   | -18.2259 | -6.7265 | 105.5904 | -4.5278 |
|                                                     | 10 | -4.4042 | -15.1153 | -26.5988 | -8.9640 | 79.7274  | -4.4042 |
| <b>11 <i>h</i>TAAR1 EC<sub>50</sub> =<br/>29 nM</b> | 1  | -6.5403 | -19.5563 | -14.5225 | -5.6869 | 62.9233  | -6.5403 |
|                                                     | 2  | -5.9477 | -20.4275 | -20.2596 | -7.1048 | 75.8684  | -5.9477 |
|                                                     | 3  | -5.5794 | -3.8330  | -20.3892 | -6.4052 | 101.1149 | -5.5794 |
|                                                     | 4  | -4.9383 | 30.9561  | -17.6864 | -5.2506 | 151.1868 | -4.9383 |
|                                                     | 5  | -4.7740 | -15.4236 | -18.9327 | -5.7316 | 94.4706  | -4.7740 |
|                                                     | 6  | -4.5015 | -10.7896 | -23.9205 | -6.7852 | 128.0676 | -4.5015 |
|                                                     | 7  | -4.2028 | 3.8652   | -24.0286 | -6.0623 | 120.0662 | -4.2028 |
|                                                     | 8  | -4.0909 | -10.6074 | -20.7314 | -5.3486 | 113.3602 | -4.0909 |
|                                                     | 9  | -3.9631 | 5.2321   | -21.9646 | -7.3569 | 138.6045 | -3.9631 |
|                                                     | 10 | -3.9504 | 34.7177  | -25.9150 | -5.8180 | 163.3991 | -3.9504 |
| <b>12 <i>h</i>TAAR1 EC<sub>50</sub> =<br/>59 nM</b> | 1  | -6.1163 | 11.4990  | -20.5053 | -5.8631 | 69.3239  | -6.1163 |
|                                                     | 2  | -5.7853 | 11.5036  | -18.0575 | -5.7288 | 79.9161  | -5.7853 |
|                                                     | 3  | -5.3599 | 8.4386   | -24.0783 | -5.8641 | 83.9387  | -5.3599 |

|                                                   |    |         |          |          |         |          |         |
|---------------------------------------------------|----|---------|----------|----------|---------|----------|---------|
|                                                   | 4  | -4.8889 | 2.5612   | -15.9503 | -5.7294 | 100.6678 | -4.8889 |
|                                                   | 5  | -4.8883 | 2.5565   | -21.0558 | -6.0650 | 100.6710 | -4.8883 |
|                                                   | 6  | -4.6423 | -5.1033  | -13.4893 | -5.8212 | 74.4964  | -4.6423 |
|                                                   | 7  | -4.5529 | -17.9619 | -15.4083 | -5.6704 | 78.6064  | -4.5529 |
|                                                   | 8  | -4.2597 | 3.7235   | -25.8562 | -6.7033 | 131.1304 | -4.2597 |
|                                                   | 9  | -4.0331 | 3.2943   | -23.2267 | -8.2936 | 108.5065 | -4.0331 |
|                                                   | 10 | -3.9450 | 0.8249   | -24.8451 | -6.9027 | 107.6811 | -3.9450 |
| <b>13 <i>h</i>TAAR1 EC<sub>50</sub> = 140 nM</b>  | 1  | -5.1443 | 16.4722  | -19.8323 | -5.5490 | 105.4604 | -5.1443 |
|                                                   | 2  | -5.0409 | 3.9383   | -16.3617 | -5.4371 | 134.0432 | -5.0409 |
|                                                   | 3  | -4.8325 | 8.6100   | -25.6461 | -5.3101 | 98.0344  | -4.8325 |
|                                                   | 4  | -4.6731 | 39.6288  | -20.7259 | -5.7898 | 136.0357 | -4.6731 |
|                                                   | 5  | -4.6594 | 6.8118   | -25.9618 | -6.9038 | 103.8084 | -4.6594 |
|                                                   | 6  | -4.0228 | 26.3867  | -18.9750 | -5.2970 | 134.4154 | -4.0228 |
|                                                   | 7  | -3.8576 | 45.2923  | -20.4072 | -5.7987 | 173.8326 | -3.8576 |
|                                                   | 8  | -3.5531 | 24.4497  | -29.6152 | -7.3284 | 152.8035 | -3.5531 |
|                                                   | 9  | -3.4221 | 15.1629  | -24.5529 | -6.3183 | 129.3527 | -3.4221 |
|                                                   | 10 | -3.3680 | 21.4588  | -20.2008 | -5.4345 | 142.7564 | -3.3680 |
| <b>14 <i>h</i>TAAR1 EC<sub>50</sub> = 230 nM</b>  | 1  | -6.3802 | -8.4023  | -24.5127 | -9.3928 | 102.1423 | -6.3802 |
|                                                   | 2  | -6.3682 | -10.9504 | -19.2253 | -6.3457 | 92.2616  | -6.3682 |
|                                                   | 3  | -5.8151 | 4.3051   | -20.0694 | -7.2129 | 78.1539  | -5.8151 |
|                                                   | 4  | -5.3961 | -12.7965 | -23.2141 | -7.4878 | 70.0902  | -5.3961 |
|                                                   | 5  | -5.3954 | -15.5105 | -14.6270 | -6.3440 | 75.9124  | -5.3954 |
|                                                   | 6  | -5.2506 | -1.9586  | -20.3966 | -7.1428 | 70.1610  | -5.2506 |
|                                                   | 7  | -4.6664 | 1.0293   | -19.9878 | -6.2998 | 74.4637  | -4.6664 |
|                                                   | 8  | -4.6658 | -6.6334  | -22.8947 | -6.0705 | 76.8432  | -4.6658 |
|                                                   | 9  | -4.5627 | -9.0311  | -25.9286 | -6.0815 | 88.5458  | -4.5627 |
|                                                   | 10 | -4.3734 | 49.8935  | -28.3964 | -6.6913 | 142.9782 | -4.3734 |
| <b>15 <i>h</i>TAAR1 EC<sub>50</sub> = 1540 nM</b> | 1  | -4.6935 | -38.7737 | -23.0568 | -7.3259 | 33.4581  | -4.6935 |
|                                                   | 2  | -4.6063 | -23.3700 | -21.6994 | -7.4541 | 56.1294  | -4.6063 |
|                                                   | 3  | -4.6045 | -33.9480 | -21.5388 | -6.8726 | 51.1592  | -4.6045 |
|                                                   | 4  | -4.5026 | -26.2055 | -21.1349 | -7.3844 | 44.0496  | -4.5026 |
|                                                   | 5  | -4.1954 | -27.8418 | -17.1561 | -7.6554 | 89.0193  | -4.1954 |
|                                                   | 6  | -4.1684 | -27.6434 | -17.1135 | -7.9038 | 79.9943  | -4.1684 |
|                                                   | 7  | -3.7648 | -21.1075 | -17.9724 | -8.5882 | 76.3813  | -3.7648 |
|                                                   | 8  | -3.6738 | -12.7704 | -22.6013 | -6.8524 | 72.2670  | -3.6738 |
|                                                   | 9  | -3.6654 | -34.7427 | -22.1921 | -6.9171 | 50.0567  | -3.6654 |
|                                                   | 10 | -3.6095 | -33.4180 | -24.0519 | -7.8969 | 74.1526  | -3.6095 |
| <b>16 <i>h</i>TAAR1 EC<sub>50</sub> = 730 nM</b>  | 1  | -7.2651 | -17.4721 | -25.5876 | -8.9942 | 68.6147  | -7.2651 |
|                                                   | 2  | -5.3596 | -21.4498 | -24.2996 | -5.9722 | 74.7530  | -5.3596 |
|                                                   | 3  | -4.9836 | -30.8151 | -21.6403 | -8.1013 | 77.0429  | -4.9836 |
|                                                   | 4  | -4.9480 | -20.4703 | -26.1824 | -6.0976 | 54.3206  | -4.9480 |
|                                                   | 5  | -4.8668 | -17.2160 | -23.9299 | -6.7845 | 57.7022  | -4.8668 |
|                                                   | 6  | -4.5503 | -22.8495 | -17.8445 | -7.0779 | 95.5715  | -4.5503 |

|                                                   |    |         |          |          |         |          |         |
|---------------------------------------------------|----|---------|----------|----------|---------|----------|---------|
|                                                   | 7  | -4.5470 | -10.6552 | -24.8644 | -6.5041 | 89.7699  | -4.5470 |
|                                                   | 8  | -4.1172 | -7.0385  | -26.3356 | -6.5422 | 98.3558  | -4.1172 |
|                                                   | 9  | -4.0177 | -9.9734  | -22.9014 | -6.0367 | 95.1175  | -4.0177 |
|                                                   | 10 | -3.9598 | -16.3538 | -17.9432 | -7.2324 | 89.4466  | -3.9598 |
| <b>17 <i>h</i>TAAR1 EC<sub>50</sub> = 2260 nM</b> | 1  | -5.9924 | -19.6231 | -26.9717 | -8.0984 | 64.6049  | -5.9924 |
|                                                   | 2  | -5.9542 | -17.7467 | -24.1101 | -5.7430 | 87.8876  | -5.9542 |
|                                                   | 3  | -5.4397 | -17.1603 | -19.2931 | -5.8601 | 94.9349  | -5.4397 |
|                                                   | 4  | -5.0130 | -7.8555  | -16.3583 | -5.5924 | 110.2700 | -5.0130 |
|                                                   | 5  | -4.9463 | -11.7779 | -20.7162 | -6.5320 | 127.3136 | -4.9463 |
|                                                   | 6  | -4.8433 | -21.3077 | -23.4846 | -6.9001 | 84.2078  | -4.8433 |
|                                                   | 7  | -4.2519 | -6.6178  | -19.4581 | -5.6316 | 90.9768  | -4.2519 |
|                                                   | 8  | -4.2384 | -18.1158 | -23.0880 | -7.1305 | 122.9625 | -4.2384 |
|                                                   | 9  | -4.2357 | -10.2552 | -27.7198 | -8.0031 | 133.2605 | -4.2357 |
|                                                   | 10 | -4.2276 | 19.8144  | -25.6749 | -6.3408 | 105.5253 | -4.2276 |
| <b>18 <i>h</i>TAAR1 EC<sub>50</sub> = 18 nM</b>   | 1  | -5.8995 | -19.4477 | -21.5990 | -6.4736 | 66.7397  | -5.8995 |
|                                                   | 2  | -5.8858 | -8.7701  | -23.5652 | -7.2797 | 97.4173  | -5.8858 |
|                                                   | 3  | -5.8241 | 84.7990  | -17.0127 | -5.4463 | 85.9081  | -5.8241 |
|                                                   | 4  | -5.3851 | -4.7572  | -22.4809 | -5.8050 | 110.2812 | -5.3851 |
|                                                   | 5  | -5.2534 | 12.9457  | -17.8497 | -5.3066 | 112.5593 | -5.2534 |
|                                                   | 6  | -5.1653 | -10.6398 | -19.6421 | -5.4023 | 83.8682  | -5.1653 |
|                                                   | 7  | -5.1115 | -15.4849 | -23.9871 | -5.7397 | 83.0481  | -5.1115 |
|                                                   | 8  | -4.9875 | -20.1539 | -20.4906 | -5.8840 | 78.1003  | -4.9875 |
|                                                   | 9  | -4.9202 | 15.9377  | -26.1015 | -6.0793 | 130.2157 | -4.9202 |
|                                                   | 10 | -4.4274 | -15.7983 | -22.3029 | -6.1400 | 98.4870  | -4.4274 |
| <b>19 <i>h</i>TAAR1 EC<sub>50</sub> = 27 nM</b>   | 1  | -5.8673 | -29.4537 | -22.2913 | -6.3345 | 66.8797  | -5.8673 |
|                                                   | 2  | -5.1821 | -4.7192  | -16.6009 | -6.0338 | 85.4327  | -5.1821 |
|                                                   | 3  | -5.1051 | -29.3070 | -21.2214 | -7.6320 | 54.3333  | -5.1051 |
|                                                   | 4  | -5.0356 | -31.7821 | -19.8464 | -6.2416 | 56.2526  | -5.0356 |
|                                                   | 5  | -5.0229 | 2.7465   | -20.9697 | -6.2478 | 96.8197  | -5.0229 |
|                                                   | 6  | -5.0225 | -34.7393 | -20.7167 | -7.6373 | 68.4762  | -5.0225 |
|                                                   | 7  | -5.0009 | -30.7104 | -24.0461 | -7.9744 | 67.5973  | -5.0009 |
|                                                   | 8  | -4.9965 | -4.4260  | -18.8881 | -6.1356 | 90.9592  | -4.9965 |
|                                                   | 9  | -4.9305 | -32.7494 | -21.6785 | -7.1063 | 68.4227  | -4.9305 |
|                                                   | 10 | -4.7565 | -31.6748 | -20.7138 | -6.3672 | 57.5943  | -4.7565 |
| <b>20 <i>h</i>TAAR1 EC<sub>50</sub> = 360 nM</b>  | 1  | -5.1471 | -5.4932  | -23.5130 | -8.2849 | 58.9700  | -5.1471 |
|                                                   | 2  | -4.8847 | -15.9983 | -24.5901 | -6.9573 | 51.1508  | -4.8847 |
|                                                   | 3  | -4.6718 | -20.5389 | -18.2102 | -7.2898 | 55.0088  | -4.6718 |
|                                                   | 4  | -4.3880 | -18.3302 | -22.5202 | -8.1003 | 72.3603  | -4.3880 |
|                                                   | 5  | -4.3529 | -26.6350 | -19.8866 | -7.8173 | 43.5059  | -4.3529 |
|                                                   | 6  | -4.0570 | -19.9268 | -18.8019 | -6.8934 | 57.2523  | -4.0570 |
|                                                   | 7  | -3.9721 | -22.0313 | -15.2656 | -7.5710 | 85.4728  | -3.9721 |
|                                                   | 8  | -3.8822 | -19.4499 | -18.7427 | -7.3388 | 55.6253  | -3.8822 |
|                                                   | 9  | -3.7071 | -11.9078 | -23.0672 | -8.0938 | 64.0509  | -3.7071 |

|                                                       |    |         |          |          |         |         |         |
|-------------------------------------------------------|----|---------|----------|----------|---------|---------|---------|
|                                                       | 10 | -3.5732 | -14.0306 | -23.8937 | -7.3378 | 89.3986 | -3.5732 |
| <b>21</b> <i>h</i> TAAR1 EC <sub>50</sub> =<br>9 nM   | 1  | -7.1321 | -27.3425 | -24.5538 | -8.0463 | 36.1247 | -7.1321 |
|                                                       | 2  | -5.7943 | -29.1738 | -27.3264 | -7.1039 | 47.8371 | -5.7943 |
|                                                       | 3  | -5.4822 | -25.5393 | -20.1710 | -6.9600 | 58.5414 | -5.4822 |
|                                                       | 4  | -5.1047 | -37.7120 | -26.1677 | -8.2777 | 51.7574 | -5.1047 |
|                                                       | 5  | -4.9999 | -46.2657 | -23.1260 | -7.6310 | 33.5905 | -4.9999 |
|                                                       | 6  | -4.6681 | -31.5881 | -18.5909 | -7.7499 | 77.4750 | -4.6681 |
|                                                       | 7  | -4.5985 | -12.3695 | -22.4607 | -7.3528 | 83.3501 | -4.5985 |
|                                                       | 8  | -4.5097 | -42.3900 | -16.6551 | -7.0548 | 69.8001 | -4.5097 |
|                                                       | 9  | -4.4846 | -42.8587 | -23.6359 | -8.7270 | 44.0275 | -4.4846 |
|                                                       | 10 | -4.3983 | -38.4380 | -16.6926 | -6.7957 | 75.4903 | -4.3983 |
| <b>22</b> <i>h</i> TAAR1 EC <sub>50</sub> =<br>67 nM  | 1  | -6.2967 | -40.9669 | -17.0249 | -8.0597 | 26.8154 | -6.2967 |
|                                                       | 2  | -5.2174 | -37.8697 | -26.1858 | -9.4604 | 25.5665 | -5.2174 |
|                                                       | 3  | -4.5791 | -37.6446 | -20.3492 | -7.1420 | 30.0341 | -4.5791 |
|                                                       | 4  | -4.4556 | -43.9240 | -23.7566 | -7.0644 | 19.1589 | -4.4556 |
|                                                       | 5  | -4.0838 | -41.3367 | -19.3330 | -7.0497 | 23.2138 | -4.0838 |
|                                                       | 6  | -3.7624 | -39.7435 | -21.5506 | -7.1900 | 38.5874 | -3.7624 |
|                                                       | 7  | -3.5559 | -32.3070 | -17.7689 | -7.4242 | 48.9301 | -3.5559 |
|                                                       | 8  | -3.3917 | -42.3285 | -21.6941 | -7.2785 | 82.8841 | -3.3917 |
|                                                       | 9  | -3.0253 | -26.8048 | -19.8943 | -7.2886 | 77.0915 | -3.0253 |
|                                                       | 10 | -2.8186 | -33.4570 | -21.0733 | -7.1998 | 37.6987 | -2.8186 |
| <b>23</b> <i>h</i> TAAR1 EC <sub>50</sub> =<br>23 nM  | 1  | -6.6376 | -35.2316 | -25.3815 | -7.1150 | 38.1100 | -6.6376 |
|                                                       | 2  | -5.9792 | -32.8052 | -21.4647 | -7.0396 | 41.2152 | -5.9792 |
|                                                       | 3  | -5.7333 | -25.3283 | -24.7910 | -7.6761 | 42.7956 | -5.7333 |
|                                                       | 4  | -5.3401 | -24.8614 | -21.8836 | -7.7691 | 34.6886 | -5.3401 |
|                                                       | 5  | -4.8696 | -41.0606 | -20.3802 | -7.3974 | 28.5993 | -4.8696 |
|                                                       | 6  | -4.7172 | -32.2484 | -20.8973 | -7.3405 | 34.3990 | -4.7172 |
|                                                       | 7  | -4.6542 | -33.3414 | -18.8737 | -7.2548 | 42.7109 | -4.6542 |
|                                                       | 8  | -4.6188 | -35.3914 | -23.0510 | -6.9705 | 32.7379 | -4.6188 |
|                                                       | 9  | -4.4178 | -27.7386 | -18.7359 | -7.4912 | 43.9964 | -4.4178 |
|                                                       | 10 | -4.1274 | -34.0951 | -23.7766 | -7.1517 | 54.4393 | -4.1274 |
| <b>24</b> <i>h</i> TAAR1 EC <sub>50</sub> =<br>21 nM  | 1  | -6.7660 | -39.2142 | -21.2077 | -7.7919 | 35.2301 | -6.7660 |
|                                                       | 2  | -6.3869 | -26.7505 | -23.6495 | -8.5964 | 36.1577 | -6.3869 |
|                                                       | 3  | -5.8919 | -40.2858 | -25.7987 | -8.3650 | 29.6380 | -5.8919 |
|                                                       | 4  | -5.3564 | -18.0542 | -23.1650 | -7.4576 | 39.9734 | -5.3564 |
|                                                       | 5  | -4.8150 | -35.0663 | -22.8922 | -7.3870 | 64.5351 | -4.8150 |
|                                                       | 6  | -4.7168 | -31.2658 | -19.9409 | -8.1314 | 46.3817 | -4.7168 |
|                                                       | 7  | -4.4596 | -37.7640 | -22.7318 | -8.3238 | 42.2492 | -4.4596 |
|                                                       | 8  | -4.4380 | -43.1819 | -22.8206 | -7.5171 | 32.1591 | -4.4380 |
|                                                       | 9  | -4.4122 | -35.2245 | -22.3556 | -7.5842 | 39.8276 | -4.4122 |
|                                                       | 10 | -4.0434 | -35.2589 | -15.1747 | -7.9072 | 48.1488 | -4.0434 |
| <b>25</b> <i>h</i> TAAR1 EC <sub>50</sub> =<br>143 nM | 1  | -6.0587 | -40.0817 | -18.9627 | -8.2905 | 40.0792 | -6.0587 |
|                                                       | 2  | -5.7859 | -37.4548 | -22.4010 | -7.3645 | 40.7768 | -5.7859 |

|                                                |         |          |          |          |          |          |         |
|------------------------------------------------|---------|----------|----------|----------|----------|----------|---------|
|                                                | 3       | -4.8708  | -33.1073 | -22.3470 | -7.6797  | 38.5799  | -4.8708 |
|                                                | 4       | -4.3526  | -35.7069 | -24.4994 | -8.1462  | 44.8309  | -4.3526 |
|                                                | 5       | -4.2661  | -28.6965 | -19.5447 | -7.7417  | 63.8305  | -4.2661 |
|                                                | 6       | -4.2294  | -40.7538 | -22.0262 | -7.6565  | 43.6701  | -4.2294 |
|                                                | 7       | -3.6653  | -41.9682 | -22.6719 | -7.3594  | 86.0401  | -3.6653 |
|                                                | 8       | -3.0846  | -38.6781 | -19.8189 | -7.5563  | 48.8080  | -3.0846 |
|                                                | 9       | -2.8487  | -7.0492  | -25.0847 | -7.8930  | 106.0186 | -2.8487 |
|                                                | 10      | -2.2486  | -26.3095 | -18.7892 | -7.8561  | 78.0564  | -2.2486 |
| 26 <i>h</i> TAAR1 EC <sub>50</sub> = 31 nM     | 1       | -6.5172  | -19.2759 | -23.3346 | -8.6370  | 63.0470  | -6.5172 |
|                                                | 2       | -6.4759  | -26.3456 | -15.8418 | -7.6644  | 51.4135  | -6.4759 |
|                                                | 3       | -6.2835  | -28.1116 | -24.4181 | -9.1002  | 48.5919  | -6.2835 |
|                                                | 4       | -5.2983  | -25.9763 | -24.3488 | -7.6943  | 69.6108  | -5.2983 |
|                                                | 5       | -5.1907  | -28.9903 | -21.4981 | -7.3354  | 40.4314  | -5.1907 |
|                                                | 6       | -4.9580  | -30.8108 | -21.5106 | -8.2095  | 35.7579  | -4.9580 |
|                                                | 7       | -4.8735  | -28.9794 | -20.5045 | -8.0553  | 55.5786  | -4.8735 |
|                                                | 8       | -4.6469  | -26.3943 | -22.1587 | -8.5537  | 61.7573  | -4.6469 |
|                                                | 9       | -4.5080  | -24.8827 | -23.8021 | -7.6090  | 41.9113  | -4.5080 |
| 10                                             | -4.4422 | -20.7882 | -21.8810 | -8.0998  | 70.0162  | -4.4422  |         |
| 27 <i>h</i> TAAR1 EC <sub>50</sub> = 150 nM    | 1       | -5.9241  | -39.8122 | -16.4641 | -8.2010  | 48.7249  | -5.9241 |
|                                                | 2       | -5.6790  | -35.9067 | -22.3257 | -7.7803  | 51.8193  | -5.6790 |
|                                                | 3       | -4.9674  | -32.0498 | -21.5616 | -7.9531  | 42.0947  | -4.9674 |
|                                                | 4       | -4.2378  | -40.1425 | -22.0259 | -7.8717  | 48.0580  | -4.2378 |
|                                                | 5       | -4.1524  | -27.9701 | -19.3901 | -7.8495  | 73.3024  | -4.1524 |
|                                                | 6       | -3.5650  | -41.2960 | -22.3936 | -7.5027  | 90.2077  | -3.5650 |
|                                                | 7       | -3.1667  | -37.6019 | -18.9126 | -7.5024  | 54.1272  | -3.1667 |
|                                                | 8       | -2.5406  | 15.6275  | -24.8262 | -7.8442  | 124.6538 | -2.5406 |
|                                                | 9       | -2.4258  | 15.6385  | -22.8453 | -7.7564  | 121.6276 | -2.4258 |
| 10                                             | -1.1355 | 15.9452  | -21.8342 | -7.4511  | 119.5627 | -1.1355  |         |
| 28 <i>h</i> TAAR1 EC <sub>50</sub> = 10,000 nM | 1       | -5.0876  | 8.5288   | -31.0970 | -8.2167  | 69.7980  | -5.0876 |
|                                                | 2       | -4.8677  | -14.8992 | -24.1368 | -7.2600  | 90.2528  | -4.8677 |
|                                                | 3       | -4.8613  | -2.1946  | -24.1086 | -7.3924  | 100.3444 | -4.8613 |
|                                                | 4       | -4.8151  | -12.4050 | -22.9402 | -7.5325  | 80.3298  | -4.8151 |
|                                                | 5       | -4.0645  | 3.7944   | -25.5766 | -7.2105  | 107.4177 | -4.0645 |
|                                                | 6       | -3.3866  | -7.9762  | -32.1872 | -7.3126  | 124.0533 | -3.3866 |
|                                                | 7       | -3.3620  | 6.9004   | -34.7742 | -8.9816  | 145.1023 | -3.3620 |
|                                                | 8       | -3.2907  | 17.1154  | -34.9518 | -8.6153  | 135.9447 | -3.2907 |
|                                                | 9       | -2.9559  | 0.4934   | -26.3173 | -8.5449  | 138.4343 | -2.9559 |
| 10                                             | -2.5781 | -9.2297  | -23.2777 | -8.7709  | 132.2009 | -2.5781  |         |
| 29 <i>h</i> TAAR1 EC <sub>50</sub> = 165 nM    | 1       | -5.5681  | -2.7817  | -21.7057 | -6.7897  | 98.0218  | -5.5681 |
|                                                | 2       | -5.4285  | 6.4681   | -18.3928 | -8.4757  | 90.3379  | -5.4285 |
|                                                | 3       | -5.0490  | -22.5101 | -24.2387 | -7.9250  | 77.6759  | -5.0490 |
|                                                | 4       | -4.8980  | 5.7462   | -20.2321 | -7.2826  | 68.6273  | -4.8980 |
|                                                | 5       | -4.7759  | -7.2525  | -22.2122 | -6.7125  | 74.0144  | -4.7759 |

|                                                   |    |         |          |          |         |          |         |
|---------------------------------------------------|----|---------|----------|----------|---------|----------|---------|
|                                                   | 6  | -4.7746 | -7.0220  | -24.6720 | -7.0475 | 86.0462  | -4.7746 |
|                                                   | 7  | -4.7402 | -8.7031  | -24.4684 | -7.8356 | 103.4484 | -4.7402 |
|                                                   | 8  | -4.5584 | -9.0113  | -22.3071 | -8.1303 | 78.4164  | -4.5584 |
|                                                   | 9  | -4.3533 | -9.1699  | -21.9990 | -6.6961 | 62.8561  | -4.3533 |
|                                                   | 10 | -4.1758 | -12.5683 | -21.5935 | -7.0961 | 55.2545  | -4.1758 |
| <b>30 <i>h</i>TAAR1 EC<sub>50</sub> = 41 nM</b>   | 1  | -5.7542 | 12.9506  | -24.9927 | -7.1019 | 99.4690  | -5.7542 |
|                                                   | 2  | -5.6246 | -6.8423  | -19.7980 | -6.8472 | 101.4978 | -5.6246 |
|                                                   | 3  | -5.1191 | 12.0748  | -23.5430 | -7.2725 | 94.8400  | -5.1191 |
|                                                   | 4  | -4.9574 | 5.4876   | -22.0978 | -7.4241 | 95.0573  | -4.9574 |
|                                                   | 5  | -4.9034 | 37.4219  | -26.6170 | -7.4857 | 93.0567  | -4.9034 |
|                                                   | 6  | -4.6665 | -4.3461  | -24.9162 | -7.8693 | 105.3818 | -4.6665 |
|                                                   | 7  | -4.3741 | 26.1608  | -20.9977 | -5.9105 | 136.8058 | -4.3741 |
|                                                   | 8  | -4.3737 | 1.3348   | -17.3248 | -5.7469 | 75.6871  | -4.3737 |
|                                                   | 9  | -4.1238 | -2.6108  | -27.7652 | -7.2259 | 119.6468 | -4.1238 |
|                                                   | 10 | -4.0725 | -4.1149  | -21.9351 | -6.2197 | 115.9044 | -4.0725 |
| <b>31 <i>h</i>TAAR1 EC<sub>50</sub> = 2670 nM</b> | 1  | -5.2125 | -12.8271 | -24.0601 | -7.4513 | 82.4449  | -5.2125 |
|                                                   | 2  | -5.1545 | -24.6554 | -23.4979 | -7.1135 | 64.2694  | -5.1545 |
|                                                   | 3  | -4.9737 | 8.7000   | -26.0391 | -7.5866 | 68.6277  | -4.9737 |
|                                                   | 4  | -4.7171 | -1.2377  | -20.8628 | -8.3721 | 72.5991  | -4.7171 |
|                                                   | 5  | -4.5298 | 2.3445   | -19.5213 | -9.7540 | 112.1964 | -4.5298 |
|                                                   | 6  | -4.4678 | -4.6109  | -19.0481 | -7.5815 | 55.9544  | -4.4678 |
|                                                   | 7  | -4.4568 | -13.3755 | -26.6144 | -8.2111 | 76.9502  | -4.4568 |
|                                                   | 8  | -4.3886 | -8.1993  | -23.0638 | -8.0742 | 49.1586  | -4.3886 |
|                                                   | 9  | -4.2369 | 2.2722   | -21.5274 | -8.4353 | 109.6801 | -4.2369 |
|                                                   | 10 | -4.0950 | -17.4087 | -23.7741 | -8.2173 | 64.1929  | -4.0950 |
| <b>32 <i>h</i>TAAR1 EC<sub>50</sub> = 490 nM</b>  | 1  | -5.6820 | -27.7089 | -27.7691 | -9.4364 | 59.2260  | -5.6820 |
|                                                   | 2  | -5.6674 | -15.1882 | -25.9686 | -8.8388 | 54.6854  | -5.6674 |
|                                                   | 3  | -5.5078 | -29.6561 | -23.4904 | -7.8403 | 46.0487  | -5.5078 |
|                                                   | 4  | -5.3184 | -29.7925 | -27.0327 | -8.7333 | 43.9000  | -5.3184 |
|                                                   | 5  | -5.0350 | -12.1507 | -25.3950 | -7.6953 | 56.3332  | -5.0350 |
|                                                   | 6  | -4.6034 | -31.2222 | -23.6655 | -8.3929 | 51.1106  | -4.6034 |
|                                                   | 7  | -4.2767 | -11.5550 | -21.1087 | -8.3793 | 71.0925  | -4.2767 |
|                                                   | 8  | -4.2250 | -21.5578 | -27.1114 | -9.1363 | 57.3157  | -4.2250 |
|                                                   | 9  | -4.1119 | -14.3344 | -22.3300 | -7.8000 | 76.4074  | -4.1119 |
|                                                   | 10 | -3.8845 | -14.2602 | -22.8312 | -7.7458 | 82.7195  | -3.8845 |
| <b>33 <i>h</i>TAAR1 EC<sub>50</sub> = 67 nM</b>   | 1  | -6.7540 | -27.4888 | -21.3524 | -7.5644 | 34.9690  | -6.7540 |
|                                                   | 2  | -5.7917 | -30.7316 | -23.7091 | -7.4657 | 37.8438  | -5.7917 |
|                                                   | 3  | -5.5037 | -20.0455 | -26.4736 | -8.0018 | 38.7906  | -5.5037 |
|                                                   | 4  | -5.1330 | -22.6209 | -21.6061 | -7.9489 | 50.6076  | -5.1330 |
|                                                   | 5  | -4.7100 | -30.0040 | -23.2812 | -7.5560 | 32.0300  | -4.7100 |
|                                                   | 6  | -4.5396 | -32.2064 | -24.2715 | -7.7641 | 38.3439  | -4.5396 |
|                                                   | 7  | -4.4099 | -37.2445 | -23.6388 | -7.9031 | 30.5661  | -4.4099 |
|                                                   | 8  | -4.0668 | -24.3428 | -25.9083 | -8.8428 | 39.3740  | -4.0668 |

|                                                     |    |         |          |          |         |          |         |
|-----------------------------------------------------|----|---------|----------|----------|---------|----------|---------|
|                                                     | 9  | -3.8794 | -15.9126 | -23.5651 | -7.7942 | 49.9351  | -3.8794 |
|                                                     | 10 | -3.8687 | -16.4945 | -23.6610 | -7.5623 | 45.7328  | -3.8687 |
| <b>34</b> <i>hTAAR1</i> EC <sub>50</sub> =<br>11 nM | 1  | -6.9372 | -42.4904 | -20.9899 | -7.4075 | 26.5656  | -6.9372 |
|                                                     | 2  | -6.3771 | -42.3133 | -19.9400 | -7.5713 | 26.9569  | -6.3771 |
|                                                     | 3  | -5.7721 | -40.2232 | -25.1115 | -7.8061 | 29.3558  | -5.7721 |
|                                                     | 4  | -5.6896 | -40.3991 | -24.8415 | -7.9584 | 24.7990  | -5.6896 |
|                                                     | 5  | -4.9783 | -40.1120 | -22.6367 | -7.6169 | 29.0833  | -4.9783 |
|                                                     | 6  | -4.9385 | -45.3749 | -24.2207 | -8.6896 | 20.3436  | -4.9385 |
|                                                     | 7  | -4.5878 | -45.6488 | -18.4336 | -7.3962 | 22.2142  | -4.5878 |
|                                                     | 8  | -4.5734 | -43.7929 | -23.8062 | -7.6180 | 22.5100  | -4.5734 |
|                                                     | 9  | -4.5461 | -38.8536 | -18.3512 | -8.6099 | 29.6434  | -4.5461 |
|                                                     | 10 | -4.2763 | -40.6445 | -22.3187 | -7.6997 | 32.1229  | -4.2763 |
| <b>35</b> <i>hTAAR1</i> EC <sub>50</sub> =<br>26 nM | 1  | -6.4499 | -19.9664 | -23.1239 | -8.0984 | 84.5830  | -6.4499 |
|                                                     | 2  | -5.6395 | 45.5510  | -22.6900 | -8.4316 | 80.4564  | -5.6395 |
|                                                     | 3  | -5.4829 | -13.9273 | -29.1873 | -8.8587 | 92.2526  | -5.4829 |
|                                                     | 4  | -5.3185 | -18.7812 | -22.0211 | -7.5539 | 54.1103  | -5.3185 |
|                                                     | 5  | -4.7950 | -16.8873 | -24.8529 | -7.1051 | 86.4337  | -4.7950 |
|                                                     | 6  | -4.5993 | -0.7258  | -24.2479 | -6.9584 | 101.3593 | -4.5993 |
|                                                     | 7  | -4.5207 | -13.3521 | -19.3669 | -8.3583 | 71.0713  | -4.5207 |
|                                                     | 8  | -4.3765 | -16.9550 | -25.2527 | -7.0470 | 73.6032  | -4.3765 |
|                                                     | 9  | -4.3654 | -23.7325 | -24.1790 | -7.0855 | 83.7357  | -4.3654 |
|                                                     | 10 | -4.3178 | -9.1482  | -25.3034 | -7.1636 | 83.2448  | -4.3178 |
| <b>36</b> <i>hTAAR1</i> EC <sub>50</sub> =<br>12 nM | 1  | -6.0151 | -0.1375  | -24.5698 | -7.5687 | 97.5924  | -6.0151 |
|                                                     | 2  | -5.1646 | -8.6264  | -23.0521 | -8.2809 | 104.9822 | -5.1646 |
|                                                     | 3  | -4.4914 | -6.4538  | -30.7809 | -9.6461 | 74.2706  | -4.4914 |
|                                                     | 4  | -4.2140 | 1.1782   | -20.9086 | -8.0394 | 106.2322 | -4.2140 |
|                                                     | 5  | -4.1202 | 18.0031  | -23.3348 | -7.9856 | 111.5072 | -4.1202 |
|                                                     | 6  | -4.1108 | 6.2332   | -26.6407 | -8.5902 | 109.8328 | -4.1108 |
|                                                     | 7  | -3.9793 | 12.0944  | -26.8630 | -7.9858 | 108.2645 | -3.9793 |
|                                                     | 8  | -3.8812 | 25.4461  | -26.9941 | -8.4958 | 112.3095 | -3.8812 |
|                                                     | 9  | -3.8181 | -14.7079 | -24.8460 | -8.4565 | 87.9899  | -3.8181 |
|                                                     | 10 | -3.6731 | -4.5015  | -17.6121 | -8.3705 | 87.5786  | -3.6731 |
| <b>37</b> <i>hTAAR1</i> EC <sub>50</sub> =<br>17 nM | 1  | -6.6828 | -26.8331 | -20.8239 | -7.5809 | 35.8364  | -6.6828 |
|                                                     | 2  | -6.0009 | -21.6556 | -26.8579 | -8.7243 | 37.9428  | -6.0009 |
|                                                     | 3  | -5.9975 | -28.7963 | -20.2330 | -7.9749 | 39.5236  | -5.9975 |
|                                                     | 4  | -5.4550 | -25.0046 | -25.4479 | -7.7344 | 41.5010  | -5.4550 |
|                                                     | 5  | -5.0607 | -18.1754 | -25.5084 | -8.6690 | 64.1625  | -5.0607 |
|                                                     | 6  | -4.7328 | -31.5658 | -22.3384 | -7.5040 | 39.3946  | -4.7328 |
|                                                     | 7  | -4.5933 | -33.0160 | -25.5540 | -9.7079 | 38.6451  | -4.5933 |
|                                                     | 8  | -4.5601 | -25.9295 | -19.2421 | -7.4896 | 38.5164  | -4.5601 |
|                                                     | 9  | -4.4189 | -25.5238 | -20.7732 | -7.7145 | 40.2514  | -4.4189 |
|                                                     | 10 | -4.3026 | -23.3862 | -16.6883 | -7.6914 | 47.3670  | -4.3026 |



**Table S4.** The calculated scoring function Glob-Prod values based on the MIFs H, N1, DRY, O are reported (compounds **1a-10a** as candidates, being **S18616** the template). The most promising **1a-3a** are depicted in pink.

| Candidate  | Glob-Prod | H      | N1     | DRY    | O      |
|------------|-----------|--------|--------|--------|--------|
| <b>1a</b>  | 0.3499    | 0.5475 | 0.2631 | 0.2196 | 0.4741 |
| <b>3a</b>  | 0.3167    | 0.5138 | 0.1492 | 0.2080 | 0.1722 |
| <b>2a</b>  | 0.3154    | 0.5391 | 0.3046 | 0.2451 | 0.2861 |
| <b>6a</b>  | 0.2962    | 0.5887 | 0.1752 | 0.2046 | 0.0100 |
| <b>4a</b>  | 0.2841    | 0.4656 | 0.1460 | 0.2228 | 0.1849 |
| <b>5a</b>  | 0.2838    | 0.5084 | 0.1717 | 0.2491 | 0.3139 |
| <b>9a</b>  | 0.2692    | 0.5431 | 0.1675 | 0.2268 | 0.0100 |
| <b>10a</b> | 0.2463    | 0.5473 | 0.1285 | 0.2361 | 0.0764 |
| <b>8a</b>  | 0.2435    | 0.5948 | 0.2953 | 0.2333 | 0.0100 |
| <b>7a</b>  | 0.1051    | 0.5535 | 0.2190 | 0.2266 | 0.1224 |

**Table S5.** The calculated scoring function Glob-Prod values based on the MIFs H, N1, DRY, O are reported (compounds **2-37** as candidates, being **S18616** the template). The benzyl-based analogues of **S18616** (**2-4**; *hTAAR1* EC<sub>50</sub> = 154-2,900 nM) and the phenyl (hetero)alkyl-containing compounds (**5-21**; *hTAAR1* EC<sub>50</sub> = 9-2,260 nM) are highlighted in cyan and orange, respectively. The hetero-containing ones are showed in italic. The **S18616** phenyl-based- analogues (**22-37**; *hTAAR1* EC<sub>50</sub> = 11-10,000 nM) are reported in white.

| Candidate | <i>hTAAR1</i><br>EC <sub>50</sub> (nM) | Glob-Prod | H      | H1     | DRY    | O      |
|-----------|----------------------------------------|-----------|--------|--------|--------|--------|
| <b>2</b>  | 154                                    | 0.6494    | 0.7427 | 0.4930 | 0.4718 | 0.5751 |
| <b>4</b>  | 2900                                   | 0.5988    | 0.6653 | 0.5636 | 0.3655 | 0.6997 |
| <b>3</b>  | 330                                    | 0.5961    | 0.7004 | 0.3643 | 0.3402 | 0.4351 |
| <b>19</b> | 27                                     | 0.5047    | 0.6382 | 0.5238 | 0.3318 | 0.4245 |
| <b>18</b> | 18                                     | 0.4735    | 0.6479 | 0.4457 | 0.2844 | 0.2094 |
| <b>7</b>  | 330                                    | 0.4472    | 0.5941 | 0.4583 | 0.3324 | 0.2771 |
| <b>6</b>  | 27                                     | 0.4429    | 0.6454 | 0.3705 | 0.3268 | 0.4258 |
| <b>20</b> | 360                                    | 0.4284    | 0.6326 | 0.3349 | 0.3769 | 0.2624 |
| <b>9</b>  | 580                                    | 0.4250    | 0.5820 | 0.3961 | 0.3211 | 0.2954 |
| <b>21</b> | 9                                      | 0.4233    | 0.6057 | 0.3220 | 0.3011 | 0.4361 |
| <b>17</b> | 2260                                   | 0.4226    | 0.5576 | 0.3092 | 0.3042 | 0.3115 |
| <b>13</b> | 140                                    | 0.4199    | 0.5991 | 0.4146 | 0.2699 | 0.5362 |
| <b>14</b> | 230                                    | 0.4170    | 0.6174 | 0.3152 | 0.3276 | 0.3228 |
| <b>15</b> | 1540                                   | 0.4090    | 0.6071 | 0.2481 | 0.3155 | 0.1255 |
| <b>30</b> | 41                                     | 0.4076    | 0.5788 | 0.4256 | 0.3334 | 0.5153 |
| <b>24</b> | 21                                     | 0.4069    | 0.5812 | 0.4457 | 0.4559 | 0.1573 |
| <b>29</b> | 165                                    | 0.4059    | 0.6185 | 0.3473 | 0.3105 | 0.5780 |
| <b>33</b> | 67                                     | 0.4013    | 0.6359 | 0.2023 | 0.3530 | 0.1605 |
| <b>23</b> | 23                                     | 0.3951    | 0.6372 | 0.1654 | 0.3468 | 0.1696 |
| <b>26</b> | 31                                     | 0.3920    | 0.6108 | 0.3636 | 0.3341 | 0.1622 |
| <b>8</b>  | 270                                    | 0.3911    | 0.5898 | 0.3199 | 0.2946 | 0.2012 |
| <b>16</b> | 730                                    | 0.3906    | 0.5842 | 0.3621 | 0.3016 | 0.1646 |
| <b>25</b> | 143                                    | 0.3762    | 0.6005 | 0.3345 | 0.4022 | 0.0919 |
| <b>35</b> | 26                                     | 0.3712    | 0.5832 | 0.3206 | 0.3409 | 0.1339 |

|    |       |        |        |        |        |        |
|----|-------|--------|--------|--------|--------|--------|
| 22 | 67    | 0.3651 | 0.5737 | 0.1765 | 0.3234 | 0.1345 |
| 36 | 12    | 0.3633 | 0.5520 | 0.2477 | 0.3140 | 0.2209 |
| 5  | 18    | 0.3606 | 0.6895 | 0.3511 | 0.2926 | 0.1541 |
| 34 | 11    | 0.3555 | 0.5716 | 0.2967 | 0.3617 | 0.1771 |
| 27 | 150   | 0.3551 | 0.5921 | 0.3294 | 0.3949 | 0.0924 |
| 10 | 27    | 0.3537 | 0.5998 | 0.2357 | 0.2957 | 0.1764 |
| 32 | 490   | 0.3533 | 0.6274 | 0.3133 | 0.2603 | 0.1591 |
| 28 | 10000 | 0.3359 | 0.5787 | 0.1788 | 0.3712 | 0.0853 |
| 11 | 29    | 0.3164 | 0.6058 | 0.1990 | 0.2526 | 0.1273 |
| 12 | 59    | 0.3144 | 0.6285 | 0.2903 | 0.2625 | 0.1762 |
| 31 | 2670  | 0.3079 | 0.5137 | 0.2600 | 0.2636 | 0.0680 |
| 37 | 17    | 0.3051 | 0.5580 | 0.2278 | 0.3221 | 0.1311 |

**Table S6.** Ten top scored docking positioning of **1a-10a** [59] at the *hTAAR1* (MOE software). The predicted  $\Delta G$  value of each protein-ligand complex has been reported, as calculated in terms of final scoring function (S, as Kcal/mol). The top-scored pose for each compound is highlighted in cyan.

| Compound  | Pose | S       | E_conf   | E_place  | E_score1 | E_refine | E_score2 |
|-----------|------|---------|----------|----------|----------|----------|----------|
| <b>1a</b> | 1    | -3.1695 | 39.7850  | -23.4114 | -7.8680  | 208.9993 | -3.1695  |
|           | 2    | -2.5717 | 24.3562  | -18.0866 | -6.0924  | 191.1877 | -2.5717  |
|           | 3    | -2.2160 | 39.7097  | -18.5221 | -5.4059  | 195.7730 | -2.2160  |
|           | 4    | -1.8085 | 14.7057  | -18.2489 | -7.1554  | 182.9133 | -1.8085  |
|           | 5    | -1.5860 | 38.1182  | -15.5368 | -6.1179  | 170.6386 | -1.5860  |
|           | 6    | -1.5235 | 15.9138  | -13.5874 | -5.4332  | 186.0287 | -1.5235  |
|           | 7    | -1.3555 | 30.3358  | -15.9548 | -6.1640  | 225.3294 | -1.3555  |
|           | 8    | -1.3196 | 66.2664  | -13.0831 | -7.1754  | 180.1840 | -1.3196  |
|           | 9    | -0.9655 | 33.0560  | -16.9291 | -6.5175  | 163.5597 | -0.9655  |
|           | 10   | -0.9648 | 39.8692  | -6.4055  | -5.4730  | 173.4964 | -0.9648  |
| <b>2a</b> | 1    | -3.1254 | 1.7335   | -22.5884 | -7.0201  | 185.3491 | -3.1254  |
|           | 2    | -2.3232 | 8.9617   | -17.0826 | -4.9698  | 190.2928 | -2.3232  |
|           | 3    | -2.2945 | 17.7624  | -24.9155 | -6.6380  | 135.1178 | -2.2945  |
|           | 4    | -1.6866 | 26.1267  | -13.8330 | -4.9297  | 207.7895 | -1.6866  |
|           | 5    | -1.6354 | 11.9378  | -15.8383 | -5.1573  | 176.1240 | -1.6354  |
|           | 6    | -1.4561 | 14.3683  | -16.2898 | -6.2027  | 166.6171 | -1.4561  |
|           | 7    | -1.1047 | 7.6837   | -20.4426 | -6.2755  | 198.7422 | -1.1047  |
|           | 8    | -0.8684 | 9.1266   | -12.2015 | -5.0801  | 183.0762 | -0.8684  |
|           | 9    | -0.8217 | 61.6527  | -16.5854 | -5.0754  | 210.5317 | -0.8217  |
|           | 10   | -0.5417 | 23.0917  | -16.3569 | -6.0353  | 235.8113 | -0.5417  |
| <b>3a</b> | 1    | -3.1408 | 3.0408   | -23.5180 | -5.5747  | 159.0475 | -3.1408  |
|           | 2    | -2.8184 | 3.6954   | -15.0186 | -5.5231  | 196.4089 | -2.8184  |
|           | 3    | -1.8132 | -0.0241  | -23.6092 | -5.5833  | 168.2438 | -1.8132  |
|           | 4    | -1.8085 | 91.7966  | -11.5544 | -5.9033  | 242.2801 | -1.8085  |
|           | 5    | -0.7493 | 30.1222  | -19.5386 | -5.7995  | 258.9114 | -0.7493  |
|           | 6    | 0.2122  | 20.4458  | -16.3604 | -5.7466  | 210.7669 | 0.2122   |
|           | 7    | 0.3028  | 111.1427 | -16.3514 | -6.3853  | 269.6474 | 0.3028   |
|           | 8    | 1.1642  | 21.1243  | -15.8258 | -6.2218  | 235.2227 | 1.1642   |

|           |    |         |          |          |         |          |         |
|-----------|----|---------|----------|----------|---------|----------|---------|
|           | 9  | 1.2276  | 53.3243  | -19.3461 | -5.6746 | 300.0271 | 1.2276  |
|           | 10 | 2.0934  | 41.8743  | -19.3917 | -5.2961 | 274.0556 | 2.0934  |
| <b>4a</b> | 1  | -2.6083 | 11.1736  | -10.6675 | -4.5770 | 175.2429 | -2.6083 |
|           | 2  | -1.9117 | 4.0776   | -17.8238 | -4.1364 | 194.3487 | -1.9117 |
|           | 3  | -1.5523 | 76.9709  | -18.9652 | -4.7434 | 247.0259 | -1.5523 |
|           | 4  | -1.0867 | 13.1575  | -7.1110  | -4.2048 | 194.2562 | -1.0867 |
|           | 5  | -1.0050 | 35.0532  | -17.8631 | -6.8073 | 226.3362 | -1.0050 |
|           | 6  | -0.8958 | 9.7662   | -18.3871 | -3.8440 | 221.7271 | -0.8958 |
|           | 7  | -0.4933 | 162.6557 | -13.9580 | -5.0616 | 252.7883 | -0.4933 |
|           | 8  | -0.3985 | -2.2733  | -15.7303 | -3.7705 | 251.6706 | -0.3985 |
|           | 9  | 0.1997  | 11.7054  | -22.5034 | -5.4538 | 318.5023 | 0.1997  |
|           | 10 | 0.9285  | 74.0496  | -11.9815 | -4.7096 | 328.8462 | 0.9285  |
| <b>5a</b> | 1  | -3.1141 | 13.7655  | -15.8626 | -4.1770 | 184.3825 | -3.1141 |
|           | 2  | -2.5561 | 22.9830  | -18.5702 | -4.0677 | 161.3013 | -2.5561 |
|           | 3  | -1.7673 | 72.7071  | -14.2557 | -3.8524 | 182.4056 | -1.7673 |
|           | 4  | -1.6489 | 99.9865  | -10.2883 | -3.3533 | 188.5953 | -1.6489 |
|           | 5  | -1.4228 | 116.8099 | -13.0224 | -3.1562 | 180.1016 | -1.4228 |
|           | 6  | -1.3112 | 60.0023  | -16.9652 | -3.9120 | 214.2038 | -1.3112 |
|           | 7  | -0.9906 | 79.3211  | -11.2642 | -3.1254 | 189.9630 | -0.9906 |
|           | 8  | -0.9636 | 53.6107  | -17.1162 | -4.8920 | 196.1929 | -0.9636 |
|           | 9  | 0.2416  | 32.5744  | -11.4511 | -3.3555 | 273.8983 | 0.2416  |
|           | 10 | 0.5239  | 69.7157  | -12.3461 | -3.1219 | 200.1670 | 0.5239  |
| <b>6a</b> | 1  | -2.9174 | 81.3393  | -12.7204 | -1.2391 | 319.5895 | -2.9174 |
|           | 2  | 0.8933  | 132.0956 | -9.9858  | -1.3394 | 322.7433 | 0.8933  |
|           | 3  | 1.7270  | 140.6551 | -11.4462 | -1.6347 | 390.6113 | 1.7270  |
|           | 4  | 3.0155  | 69.6927  | -7.0988  | -2.4115 | 486.9999 | 3.0155  |
|           | 5  | 3.2813  | 106.9135 | -10.3179 | -4.1189 | 340.8881 | 3.2813  |
|           | 6  | 3.5249  | 100.0661 | -8.2190  | -1.6014 | 456.3620 | 3.5249  |
|           | 7  | 4.0113  | 123.6151 | -16.5476 | -3.8286 | 391.3462 | 4.0113  |
|           | 8  | 4.8094  | 88.9776  | -11.8288 | -5.3447 | 573.6596 | 4.8094  |
|           | 9  | 4.8850  | 72.3250  | -12.9699 | -1.4972 | 343.3426 | 4.8850  |
|           | 10 | 5.3481  | 40.2198  | -17.1820 | -3.7854 | 375.1483 | 5.3481  |
| <b>7a</b> | 1  | 3.9286  | 255.6012 | -8.3833  | -3.6899 | 441.4577 | 3.9286  |
|           | 2  | 4.6972  | 290.5201 | -23.2742 | -2.8002 | 541.5862 | 4.6972  |
|           | 3  | 4.8943  | 213.9906 | -14.5667 | -3.0993 | 457.7971 | 4.8943  |
|           | 4  | 5.1335  | 201.9324 | -8.3003  | -1.4715 | 376.7648 | 5.1335  |
|           | 5  | 6.0859  | 223.4280 | -13.4008 | -1.1211 | 435.0092 | 6.0859  |
|           | 6  | 7.2675  | 187.8137 | -13.9482 | -2.1325 | 456.8268 | 7.2675  |
|           | 7  | 7.9419  | 158.4915 | -13.0340 | -2.6253 | 463.5701 | 7.9419  |
|           | 8  | 8.0137  | 203.9614 | -17.2135 | -1.8021 | 504.2595 | 8.0137  |
|           | 9  | 8.0624  | 256.6322 | -17.4123 | -3.4894 | 514.2152 | 8.0624  |
|           | 10 | 8.2770  | 166.7484 | -16.6370 | -4.4629 | 471.9864 | 8.2770  |
| <b>8a</b> | 1  | 0.4922  | 223.0022 | -8.8665  | -0.7471 | 359.6047 | 0.4922  |
|           | 2  | 0.8809  | 133.1885 | -21.5195 | -1.5544 | 402.7855 | 0.8809  |
|           | 3  | 2.2743  | 147.8503 | -17.1259 | -0.9820 | 360.9749 | 2.2743  |
|           | 4  | 3.2984  | 107.1270 | -5.1549  | -1.2044 | 431.6612 | 3.2984  |

|     |    |         |          |          |         |          |         |
|-----|----|---------|----------|----------|---------|----------|---------|
|     | 5  | 3.6061  | 102.1159 | -13.4230 | -0.9220 | 424.0291 | 3.6061  |
|     | 6  | 3.9386  | 196.0728 | -13.5427 | -0.7073 | 429.5690 | 3.9386  |
|     | 7  | 4.7329  | 195.8803 | -13.9889 | -2.8246 | 440.7139 | 4.7329  |
|     | 8  | 4.7864  | 64.6180  | -7.2837  | 0.0358  | 352.5703 | 4.7864  |
|     | 9  | 5.3541  | 144.1443 | -13.2699 | -0.0041 | 473.2814 | 5.3541  |
|     | 10 | 5.7769  | 248.6318 | -4.4040  | -2.1394 | 423.1394 | 5.7769  |
| 9a  | 1  | -1.4568 | 46.5824  | -16.8081 | -2.6719 | 268.8596 | -1.4568 |
|     | 2  | 0.0996  | 129.3075 | -13.4415 | -1.9082 | 301.5902 | 0.0996  |
|     | 3  | 0.7424  | 18.1360  | -18.0956 | -0.6348 | 283.8612 | 0.7424  |
|     | 4  | 2.8943  | 44.3939  | -9.6439  | -1.3603 | 325.5799 | 2.8943  |
|     | 5  | 3.7381  | 53.4073  | -10.2945 | -1.0197 | 346.0813 | 3.7381  |
|     | 6  | 3.8308  | 32.9870  | -8.6431  | -1.4346 | 351.2408 | 3.8308  |
|     | 7  | 4.2320  | 154.8272 | -12.2616 | -1.9483 | 358.0657 | 4.2320  |
|     | 8  | 4.5264  | 9.2886   | -3.2174  | -1.3169 | 349.7622 | 4.5264  |
|     | 9  | 4.9422  | 55.8297  | -14.0949 | -0.9339 | 425.2249 | 4.9422  |
|     | 10 | 5.0738  | 176.9914 | 2.0916   | -0.6523 | 415.1421 | 5.0738  |
| 10a | 1  | 0.4922  | 223.0022 | -8.8665  | -0.7471 | 359.6047 | 0.4922  |
|     | 2  | 0.8809  | 133.1885 | -21.5195 | -1.5544 | 402.7855 | 0.8809  |
|     | 3  | 2.2743  | 147.8503 | -17.1259 | -0.9820 | 360.9749 | 2.2743  |
|     | 4  | 3.2984  | 107.1270 | -5.1549  | -1.2044 | 431.6612 | 3.2984  |
|     | 5  | 3.6061  | 102.1159 | -13.4230 | -0.9220 | 424.0291 | 3.6061  |
|     | 6  | 3.9386  | 196.0728 | -13.5427 | -0.7073 | 429.5690 | 3.9386  |
|     | 7  | 4.7329  | 195.8803 | -13.9889 | -2.8246 | 440.7139 | 4.7329  |
|     | 8  | 4.7864  | 64.6180  | -7.2837  | 0.0358  | 352.5703 | 4.7864  |
|     | 9  | 5.3541  | 144.1443 | -13.2699 | -0.0041 | 473.2814 | 5.3541  |
|     | 10 | 5.7769  | 248.6318 | -4.4040  | -2.1394 | 423.1394 | 5.7769  |

**Table S7.** Calculated descriptors related to toxicity properties, cytochrome inhibition and lethal dose via mouse oral administration have been explored, as well as Pan Assay Interference structures (PAINS) analysis. The analysis has been reported for **1a-6a** [59] and for the reference **S18616** [59]. Reliability index values for a number of descriptors are shown as R.I. (values higher than 0.30 are ranked as reliable by the software).

| Comp.  | CYP2C9 <sup>a</sup><br>Inhibitor<br>(IC <sub>50</sub> < 10mM)<br>(R.I. ≥ 0.30) | CYP3A4 <sup>a</sup><br>Inhibitor<br>(IC <sub>50</sub> < 10mM)<br>(R.I. ≥ 0.30) | LD <sub>50</sub> (mg/kg) <sup>b</sup><br>Mouse oral (R.I. ≥ 0.30) | PAINS<br>DA<br>SWISSADME |
|--------|--------------------------------------------------------------------------------|--------------------------------------------------------------------------------|-------------------------------------------------------------------|--------------------------|
| 1a     | 0.01                                                                           | 0.00                                                                           | 390                                                               | 0 ALERT                  |
| 2a     | 0.01                                                                           | 0.00                                                                           | 400                                                               | 0 ALERT                  |
| 3a     | 0.02                                                                           | 0.27                                                                           | 390                                                               | 0 ALERT                  |
| 4a     | 0.00                                                                           | 0.00                                                                           | 280                                                               | 0 ALERT                  |
| 5a     | 0.00                                                                           | 0.00                                                                           | 280                                                               | 0 ALERT                  |
| 6a     | 0.06                                                                           | 0.04                                                                           | 370                                                               | 0 ALERT                  |
| S18616 | 0.02                                                                           | 0.02                                                                           | 67                                                                | 0 ALERT                  |

|  |  |  |  |  |
|--|--|--|--|--|
|  |  |  |  |  |
|--|--|--|--|--|

a Prediction of the ligand inhibitor behavior towards cytochrome CYP2C9 and CYP3A4; b Acute toxicity (LD<sub>50</sub>) for mouse after oral administration.
